# Supplementary material for: Development of acute Pseudomonas aeruginosa and Acinetobacter baumannii lung mono-challenge models in mice using oropharyngeal aspiration
Source: PubMed Central journal article supplement (PMC11580749; doi:10.1099/acmi.0.000860.v3), 2024-11-21
Supplement: acmi-6-00860-s001.pdf [file acmi-6-00860-s001.pdf]

1 **Development of acute *Pseudomonas aeruginosa* and *Acinetobacter***  
2 ***baumannii* lung mono-challenge models in mice using oropharyngeal**  
3 **aspiration.**

4 Irene Jurado-Martín\*,<sup>1,2</sup> Chaoying Ma\*,<sup>1,2</sup> Nouran Rezk<sup>1,2</sup>, Maite Sainz-Mejías,<sup>1,2</sup>  
5 Yueran Hou,<sup>1,2</sup> John A. Baugh<sup>2,3</sup> and Siobhán McClean<sup>1</sup>

6 <sup>1</sup> School of Biomedical and Biomolecular Science, University College Dublin, Dublin,  
7 Ireland

8 <sup>2</sup> UCD Conway Institute of Biomolecular & Biomedical Research, University College  
9 Dublin, Dublin, Ireland

10 <sup>3</sup> UCD School of Medicine, University College Dublin, Belfield, Dublin, Ireland

11 \* Both these authors contributed equally to this work.

12

13 Corresponding author: [siobhan.mcclean@ucd.ie](mailto:siobhan.mcclean@ucd.ie)

14

15

16

17

**SUPPLEMENTARY MATERIAL**

18

20 **Table S1.** Scoresheet used to evaluate mice severity after each procedure.

| COMBINED POST PROCEDURAL / TRIAL SCORE SHEET (General & MGS combined)                                                       |                                                                                       | 07.10.20     |                                                                                                                                       |
|-----------------------------------------------------------------------------------------------------------------------------|---------------------------------------------------------------------------------------|--------------|---------------------------------------------------------------------------------------------------------------------------------------|
| PI / Researcher                                                                                                             | Siobhán McClean/Irene Jurado                                                          | Animal ID:-  | Treatment Group:-                                                                                                                     |
| HPRA Project                                                                                                                | AE18982/p209                                                                          |              |                                                                                                                                       |
| <b>SCORE SHEET</b>                                                                                                          |                                                                                       |              |                                                                                                                                       |
| <b>Appearance</b>                                                                                                           |                                                                                       | Date/Time    | Initials                                                                                                                              |
| 0 Normal                                                                                                                    |                                                                                       |              |                                                                                                                                       |
| 1 Slight piloerection / slight change in posture or respiration                                                             |                                                                                       |              |                                                                                                                                       |
| 2 Moderate piloerection / moderate change in posture or resp                                                                |                                                                                       |              |                                                                                                                                       |
| 3 Pronounced piloerection / pronounced change in posture or resp                                                            |                                                                                       |              |                                                                                                                                       |
|                                                                                                                             | Initial weight (g)                                                                    |              |                                                                                                                                       |
| <b>Weight change:</b>                                                                                                       |                                                                                       |              |                                                                                                                                       |
| 0 Normal                                                                                                                    |                                                                                       |              |                                                                                                                                       |
| 1 Body wt <10% decrease                                                                                                     |                                                                                       |              |                                                                                                                                       |
| 2 Body wt 10-20% decrease                                                                                                   |                                                                                       |              |                                                                                                                                       |
| 3 Body wt >20% decrease                                                                                                     |                                                                                       |              |                                                                                                                                       |
| <b>Behaviour</b>                                                                                                            |                                                                                       |              |                                                                                                                                       |
| 0 Normal                                                                                                                    |                                                                                       |              |                                                                                                                                       |
| 1 Minor depression                                                                                                          |                                                                                       |              |                                                                                                                                       |
| 2 Decreased mobility or alertness / isolated                                                                                |                                                                                       |              |                                                                                                                                       |
| 3 Noticeably still / Precognatose / Restless / Vocalisation                                                                 |                                                                                       |              |                                                                                                                                       |
| <b>Hydration</b>                                                                                                            |                                                                                       |              |                                                                                                                                       |
| 0 Normal                                                                                                                    |                                                                                       |              |                                                                                                                                       |
| 1 5% dehydration - skin tents briefly, but returns to normal                                                                |                                                                                       |              |                                                                                                                                       |
| 2 10% dehydration - Skin tents, and takes more than a few seconds to return                                                 |                                                                                       |              |                                                                                                                                       |
| 3 15+% dehydration - skin tents and stays tented                                                                            |                                                                                       |              |                                                                                                                                       |
|                                                                                                                             | <b>Total (0-12)</b>                                                                   |              |                                                                                                                                       |
| <b>MOUSE GRIMACE SCALE (MGS)</b>                                                                                            |                                                                                       |              |                                                                                                                                       |
| Orbital Tightening (0, 1, 2)                                                                                                |                                                                                       |              |                                                                                                                                       |
| Nose Bulge (0, 1, 2)                                                                                                        |                                                                                       |              |                                                                                                                                       |
| Cheek Bulge (0, 1, 2)                                                                                                       |                                                                                       |              |                                                                                                                                       |
| Ear Position (0, 1, 2)                                                                                                      |                                                                                       |              |                                                                                                                                       |
|                                                                                                                             | <b>Total</b>                                                                          |              |                                                                                                                                       |
| <b>BINARY OBSERVATIONS - Comments below (with date) if answer is Y or Not OK</b>                                            |                                                                                       |              |                                                                                                                                       |
| Analgesia administered subsequent to scoring (Y/N)                                                                          |                                                                                       |              |                                                                                                                                       |
| Skin Lesions                                                                                                                | Notify BMF staff if severe                                                            |              |                                                                                                                                       |
| <b>SCORE SHEET ACTIONS (FOR MODERATE BANDING)</b>                                                                           |                                                                                       |              |                                                                                                                                       |
| Score 0-1                                                                                                                   | Normal - No action required                                                           | <b>Score</b> | <b>ACTIONS</b>                                                                                                                        |
| Score 2-4                                                                                                                   | Repeat scoring in 6 hours                                                             | 0-2          | None                                                                                                                                  |
| Score 5-7                                                                                                                   | Suffering - Administer analgesia/observe regularly/notify BMF staff (and DV by email) | 3-4          | Administer analgesia and score again in four hours                                                                                    |
| Signs of pain                                                                                                               | Analgesia per protocol/notify BMF staff. Euthanasia for severe/intractable pain       | 5-6          | Administer analgesia, notify DV by email and score again in four hours -> euthanise at that point if still scoring the same or higher |
| <b>Animal also to be euthanased (unless DV consults if):</b>                                                                |                                                                                       |              |                                                                                                                                       |
| <b>a) Score of 3 in any single category, or b) Total score of greater than 7 or c) Otherwise indicated</b>                  |                                                                                       |              |                                                                                                                                       |
| <b>COMMENTS / TECHNICAL OFFICER OBSERVATIONS: Written (with date/time) on the back of the sheet and a tick placed .....</b> |                                                                                       |              |                                                                                                                                       |
| here to indicate this has been done. Immediate euthanasia unless approved by DV to continue on trial. Notify DV by email.   |                                                                                       |              |                                                                                                                                       |

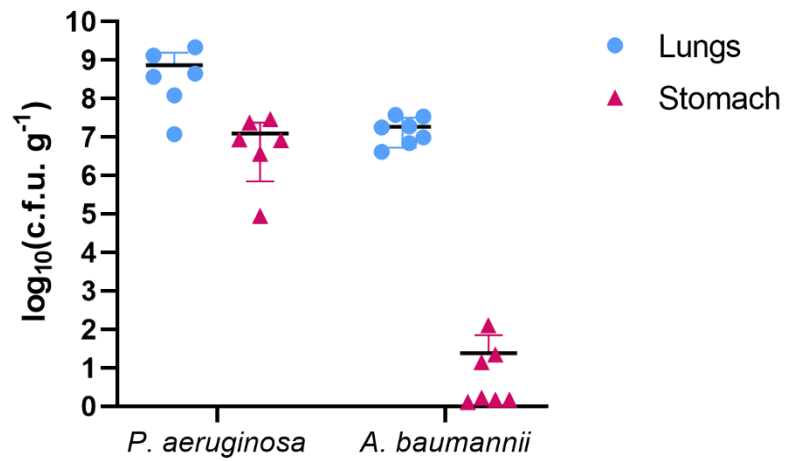

23

24 **Figure S1. Comparison of bioburden in the lungs and stomach of mice challenged with *P. aeruginosa***  
 25 **or *A. baumannii*.** The graph compares the bioburdens obtained from an experiment performed by the same  
 26 researcher, once optimisation studies were complete. *P. aeruginosa* bioburden is consistently higher than  
 27 that of *A. baumannii*. Results are represented with the mean  $\pm$  SEM, with each point representing one  
 28 mouse.

29

30

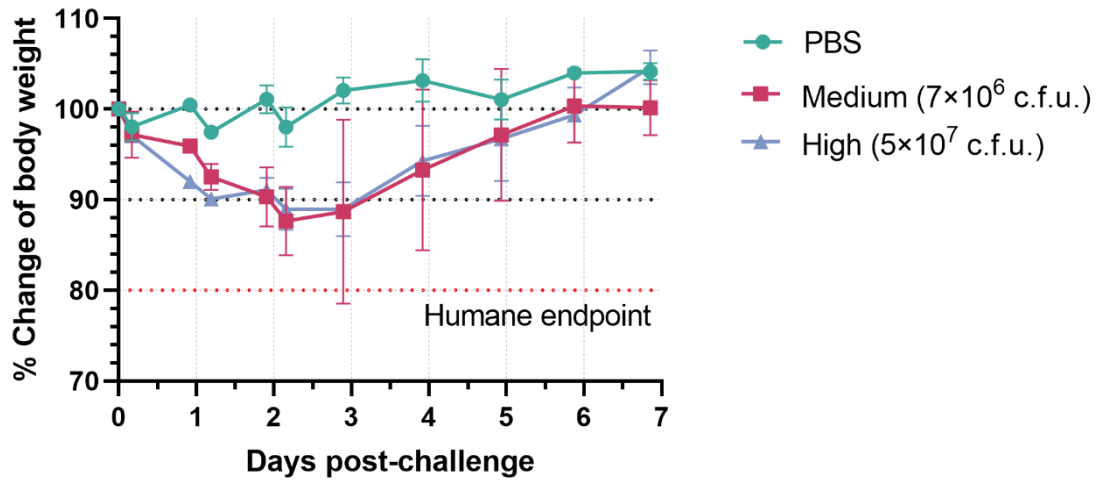

31

32 **Figure S2. Results of the acute *A. baumannii* pneumonia model 7 days after challenge.** Changes in  
33 mice weight relative to that before the procedure. Each point represents the mean  $\pm$  SEM of the mice in  
34 the group (n=2).

35

36

37

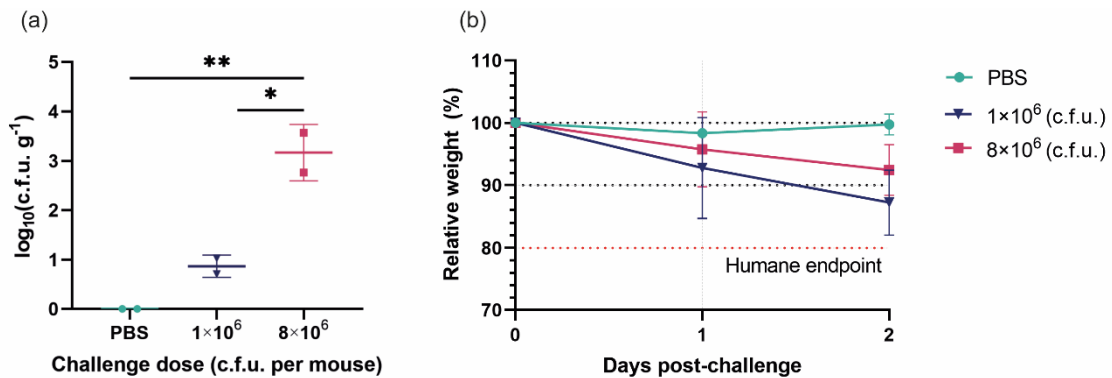

38

39 **Figure S3. Initial dose-finding pilot study performed acute *A. baumannii* pneumonia model 48 h**  
40 **after challenge.** (a) Bioburden in the lungs of mice challenged with PBS, low, or medium bacterial  
41 doses. Results are represented with the mean  $\pm$  SEM, with each point representing one mouse. (b)  
42 Relative weight lost or gained by mice relative to that before the procedure. Each point represents the  
43 mean  $\pm$  SEM of the mice in the group (n=2).

44
